# Supplementary material for: Synthesis, characterization and evaluation of the substituent effect on the amoebicide activity of new hydrazone derivatives
Source: Royal Society of Chemistry journal article supplement (doi:10.1039/c4md00075g), 2014-01-01
Supplement: c4md00075g1.pdf [file c4md00075g1.pdf]

## Synthesis, characterization and evaluation of the substituent effect on the amoebicide activity of new hydrazones derivatives

Yanis Toledano<sup>af</sup>, Ruth Meléndrez-Luévano<sup>b</sup>, Marisol Navarro-Olivarria<sup>bf</sup>, Juan Carlos García-Ramos<sup>c</sup>, Marcos Flores-Alamo<sup>c</sup>, Luis Ortiz-Frade<sup>d</sup>, Lena Ruiz-Azuara<sup>e</sup>, Blanca M. Cabrera-Vivas<sup>\*b</sup>

### Supplementary information

Collection data details, bond distances and bond angles for compound 1 (*E*)-1-((5-(4-nitrophenyl)furan-2-yl)methylene)-2-phenylhydrazine

Table S1. Crystal data and structure refinement for b24.

|                                   |                                             |                       |
|-----------------------------------|---------------------------------------------|-----------------------|
| Identification code               | shelx                                       |                       |
| Empirical formula                 | C17 H13 N3 O3                               |                       |
| Formula weight                    | 307.30                                      |                       |
| Temperature                       | 130(2) K                                    |                       |
| Wavelength                        | 1.54184 Å                                   |                       |
| Crystal system                    | Orthorhombic                                |                       |
| Space group                       | P b c a                                     |                       |
| Unit cell dimensions              | a = 12.9041(3) Å                            | $\alpha = 90^\circ$ . |
|                                   | b = 12.7877(3) Å                            | $\beta = 90^\circ$ .  |
|                                   | c = 17.6929(4) Å                            | $\gamma = 90^\circ$ . |
| Volume                            | 2919.57(12) Å <sup>3</sup>                  |                       |
| Z                                 | 8                                           |                       |
| Density (calculated)              | 1.398 Mg/m <sup>3</sup>                     |                       |
| Absorption coefficient            | 0.813 mm <sup>-1</sup>                      |                       |
| F(000)                            | 1280                                        |                       |
| Crystal size                      | 0.5142 x 0.4634 x 0.3295 mm <sup>3</sup>    |                       |
| Theta range for data collection   | 4.999 to 72.854°.                           |                       |
| Index ranges                      | -15<=h<=15, -11<=k<=15, -21<=l<=20          |                       |
| Reflections collected             | 19665                                       |                       |
| Independent reflections           | 2894 [R(int) = 0.0318]                      |                       |
| Completeness to theta = 67.684°   | 100.0 %                                     |                       |
| Refinement method                 | Full-matrix least-squares on F <sup>2</sup> |                       |
| Data / restraints / parameters    | 2894 / 1 / 212                              |                       |
| Goodness-of-fit on F <sup>2</sup> | 1.058                                       |                       |
| Final R indices [I>2sigma(I)]     | R1 = 0.0401, wR2 = 0.1020                   |                       |
| R indices (all data)              | R1 = 0.0497, wR2 = 0.1095                   |                       |

Extinction coefficient 0.00039(7)  
Largest diff. peak and hole 0.217 and -0.214 e.Å<sup>-3</sup>

Table S2. Atomic coordinates ( x 10<sup>4</sup>) and equivalent isotropic displacement parameters (Å<sup>2</sup>x 10<sup>3</sup>) for b24. U(eq) is defined as one third of the trace of the orthogonalized U<sup>ij</sup> tensor.

|       | x        | y       | z       | U(eq) |
|-------|----------|---------|---------|-------|
| C(1)  | 9860(1)  | 1533(1) | 3391(1) | 32(1) |
| C(2)  | 10799(1) | 1803(1) | 3050(1) | 36(1) |
| C(3)  | 10822(1) | 2134(1) | 2308(1) | 39(1) |
| C(4)  | 9916(1)  | 2199(1) | 1892(1) | 43(1) |
| C(5)  | 8985(1)  | 1916(1) | 2227(1) | 44(1) |
| C(6)  | 8947(1)  | 1579(1) | 2971(1) | 37(1) |
| C(7)  | 9098(1)  | 965(1)  | 5254(1) | 33(1) |
| C(8)  | 8227(1)  | 856(1)  | 5755(1) | 31(1) |
| C(9)  | 8186(1)  | 645(1)  | 6507(1) | 36(1) |
| C(10) | 7129(1)  | 612(1)  | 6707(1) | 36(1) |
| C(11) | 6578(1)  | 803(1)  | 6067(1) | 32(1) |
| C(12) | 5483(1)  | 907(1)  | 5908(1) | 32(1) |
| C(13) | 4760(1)  | 647(1)  | 6461(1) | 41(1) |
| C(14) | 3712(1)  | 767(1)  | 6327(1) | 44(1) |
| C(15) | 3396(1)  | 1134(1) | 5630(1) | 38(1) |
| C(16) | 4090(1)  | 1373(1) | 5062(1) | 37(1) |
| C(17) | 5136(1)  | 1266(1) | 5204(1) | 35(1) |
| O(1)  | 7248(1)  | 953(1)  | 5470(1) | 31(1) |
| O(2)  | 2018(1)  | 1518(1) | 4838(1) | 54(1) |
| O(3)  | 1683(1)  | 1169(1) | 6011(1) | 63(1) |
| N(1)  | 9878(1)  | 1231(1) | 4143(1) | 34(1) |
| N(2)  | 8985(1)  | 1132(1) | 4543(1) | 32(1) |
| N(3)  | 2294(1)  | 1279(1) | 5486(1) | 45(1) |

Table S3. Bond lengths [ $\text{\AA}$ ] and angles [ $^\circ$ ] for b24.

---

|             |            |
|-------------|------------|
| C(1)-N(1)   | 1.385(2)   |
| C(1)-C(6)   | 1.394(2)   |
| C(1)-C(2)   | 1.396(2)   |
| C(2)-C(3)   | 1.381(2)   |
| C(2)-H(2)   | 0.9500     |
| C(3)-C(4)   | 1.384(2)   |
| C(3)-H(3)   | 0.9500     |
| C(4)-C(5)   | 1.387(2)   |
| C(4)-H(4)   | 0.9500     |
| C(5)-C(6)   | 1.386(2)   |
| C(5)-H(5)   | 0.9500     |
| C(6)-H(6)   | 0.9500     |
| C(7)-N(2)   | 1.285(2)   |
| C(7)-C(8)   | 1.438(2)   |
| C(7)-H(7)   | 0.9500     |
| C(8)-C(9)   | 1.357(2)   |
| C(8)-O(1)   | 1.3656(16) |
| C(9)-C(10)  | 1.410(2)   |
| C(9)-H(9)   | 0.9500     |
| C(10)-C(11) | 1.358(2)   |
| C(10)-H(10) | 0.9500     |
| C(11)-O(1)  | 1.3784(17) |
| C(11)-C(12) | 1.448(2)   |
| C(12)-C(13) | 1.392(2)   |
| C(12)-C(17) | 1.401(2)   |
| C(13)-C(14) | 1.382(2)   |
| C(13)-H(13) | 0.9500     |
| C(14)-C(15) | 1.381(3)   |
| C(14)-H(14) | 0.9500     |
| C(15)-C(16) | 1.379(2)   |
| C(15)-N(3)  | 1.4572(19) |
| C(16)-C(17) | 1.380(2)   |
| C(16)-H(16) | 0.9500     |
| C(17)-H(17) | 0.9500     |

|                   |            |
|-------------------|------------|
| O(2)-N(3)         | 1.238(2)   |
| O(3)-N(3)         | 1.227(2)   |
| N(1)-N(2)         | 1.3580(17) |
| N(1)-H(1F)        | 0.935(15)  |
|                   |            |
| N(1)-C(1)-C(6)    | 122.55(13) |
| N(1)-C(1)-C(2)    | 117.93(13) |
| C(6)-C(1)-C(2)    | 119.52(14) |
| C(3)-C(2)-C(1)    | 120.34(14) |
| C(3)-C(2)-H(2)    | 119.8      |
| C(1)-C(2)-H(2)    | 119.8      |
| C(2)-C(3)-C(4)    | 120.40(15) |
| C(2)-C(3)-H(3)    | 119.8      |
| C(4)-C(3)-H(3)    | 119.8      |
| C(3)-C(4)-C(5)    | 119.22(16) |
| C(3)-C(4)-H(4)    | 120.4      |
| C(5)-C(4)-H(4)    | 120.4      |
| C(6)-C(5)-C(4)    | 121.21(15) |
| C(6)-C(5)-H(5)    | 119.4      |
| C(4)-C(5)-H(5)    | 119.4      |
| C(5)-C(6)-C(1)    | 119.29(14) |
| C(5)-C(6)-H(6)    | 120.4      |
| C(1)-C(6)-H(6)    | 120.4      |
| N(2)-C(7)-C(8)    | 122.12(14) |
| N(2)-C(7)-H(7)    | 118.9      |
| C(8)-C(7)-H(7)    | 118.9      |
| C(9)-C(8)-O(1)    | 110.14(13) |
| C(9)-C(8)-C(7)    | 130.77(13) |
| O(1)-C(8)-C(7)    | 119.07(13) |
| C(8)-C(9)-C(10)   | 106.80(13) |
| C(8)-C(9)-H(9)    | 126.6      |
| C(10)-C(9)-H(9)   | 126.6      |
| C(11)-C(10)-C(9)  | 106.95(14) |
| C(11)-C(10)-H(10) | 126.5      |
| C(9)-C(10)-H(10)  | 126.5      |
| C(10)-C(11)-O(1)  | 109.59(13) |

|                   |            |
|-------------------|------------|
| C(10)-C(11)-C(12) | 133.60(14) |
| O(1)-C(11)-C(12)  | 116.77(13) |
| C(13)-C(12)-C(17) | 119.30(14) |
| C(13)-C(12)-C(11) | 119.68(14) |
| C(17)-C(12)-C(11) | 121.02(14) |
| C(14)-C(13)-C(12) | 120.54(16) |
| C(14)-C(13)-H(13) | 119.7      |
| C(12)-C(13)-H(13) | 119.7      |
| C(15)-C(14)-C(13) | 118.68(16) |
| C(15)-C(14)-H(14) | 120.7      |
| C(13)-C(14)-H(14) | 120.7      |
| C(16)-C(15)-C(14) | 122.30(14) |
| C(16)-C(15)-N(3)  | 118.53(16) |
| C(14)-C(15)-N(3)  | 119.17(15) |
| C(15)-C(16)-C(17) | 118.68(16) |
| C(15)-C(16)-H(16) | 120.7      |
| C(17)-C(16)-H(16) | 120.7      |
| C(16)-C(17)-C(12) | 120.48(15) |
| C(16)-C(17)-H(17) | 119.8      |
| C(12)-C(17)-H(17) | 119.8      |
| C(8)-O(1)-C(11)   | 106.51(11) |
| N(2)-N(1)-C(1)    | 120.76(12) |
| N(2)-N(1)-H(1F)   | 118.2(12)  |
| C(1)-N(1)-H(1F)   | 118.5(12)  |
| C(7)-N(2)-N(1)    | 115.43(12) |
| O(3)-N(3)-O(2)    | 123.01(14) |
| O(3)-N(3)-C(15)   | 118.71(16) |
| O(2)-N(3)-C(15)   | 118.28(15) |

---

Symmetry transformations used to generate equivalent atoms:

Table S4. Anisotropic displacement parameters ( $\text{\AA}^2 \times 10^3$ ) for b24. The anisotropic displacement factor exponent takes the form:  $-2\pi^2 [ h^2 a^{*2} U^{11} + \dots + 2 h k a^* b^* U^{12} ]$

|       | U <sup>11</sup> | U <sup>22</sup> | U <sup>33</sup> | U <sup>23</sup> | U <sup>13</sup> | U <sup>12</sup> |
|-------|-----------------|-----------------|-----------------|-----------------|-----------------|-----------------|
| C(1)  | 26(1)           | 27(1)           | 41(1)           | -2(1)           | -1(1)           | 2(1)            |
| C(2)  | 25(1)           | 38(1)           | 45(1)           | 1(1)            | -1(1)           | 1(1)            |
| C(3)  | 31(1)           | 39(1)           | 47(1)           | 2(1)            | 5(1)            | 1(1)            |
| C(4)  | 42(1)           | 45(1)           | 42(1)           | 6(1)            | -2(1)           | 2(1)            |
| C(5)  | 34(1)           | 48(1)           | 50(1)           | 5(1)            | -9(1)           | 1(1)            |
| C(6)  | 26(1)           | 37(1)           | 47(1)           | 1(1)            | -2(1)           | -1(1)           |
| C(7)  | 24(1)           | 33(1)           | 42(1)           | -4(1)           | -2(1)           | 0(1)            |
| C(8)  | 21(1)           | 30(1)           | 41(1)           | -5(1)           | -3(1)           | 1(1)            |
| C(9)  | 26(1)           | 42(1)           | 40(1)           | -3(1)           | -4(1)           | 1(1)            |
| C(10) | 29(1)           | 42(1)           | 37(1)           | -3(1)           | 1(1)            | 0(1)            |
| C(11) | 26(1)           | 32(1)           | 37(1)           | -6(1)           | 3(1)            | -2(1)           |
| C(12) | 25(1)           | 32(1)           | 40(1)           | -9(1)           | 0(1)            | -1(1)           |
| C(13) | 29(1)           | 56(1)           | 37(1)           | -8(1)           | -1(1)           | -1(1)           |
| C(14) | 28(1)           | 61(1)           | 44(1)           | -15(1)          | 6(1)            | -3(1)           |
| C(15) | 21(1)           | 39(1)           | 53(1)           | -18(1)          | -4(1)           | 2(1)            |
| C(16) | 32(1)           | 32(1)           | 47(1)           | -7(1)           | -6(1)           | 2(1)            |
| C(17) | 28(1)           | 33(1)           | 43(1)           | -3(1)           | 1(1)            | 0(1)            |
| O(1)  | 23(1)           | 35(1)           | 36(1)           | -3(1)           | 0(1)            | 1(1)            |
| O(2)  | 33(1)           | 55(1)           | 73(1)           | -7(1)           | -16(1)          | 3(1)            |
| O(3)  | 25(1)           | 92(1)           | 73(1)           | -34(1)          | 4(1)            | 1(1)            |
| N(1)  | 20(1)           | 42(1)           | 40(1)           | 0(1)            | 0(1)            | 0(1)            |
| N(2)  | 23(1)           | 32(1)           | 42(1)           | -2(1)           | 2(1)            | 0(1)            |
| N(3)  | 26(1)           | 47(1)           | 62(1)           | -22(1)          | -5(1)           | 1(1)            |

Table S5. Hydrogen bonds for b24 [ $\text{\AA}$  and  $^\circ$ ].

| D-H...A             | d(D-H)    | d(H...A)  | d(D...A)   | $\angle(\text{DHA})$ |
|---------------------|-----------|-----------|------------|----------------------|
| N(1)-H(1F)...O(2)#1 | 0.935(15) | 2.120(15) | 3.0456(17) | 170.2(17)            |

Symmetry transformations used to generate equivalent atoms:

#1  $x+1,y,z$
